# Supplementary material for: Egg Protein Transferrin-Derived Peptides Irw (Lle-Arg-Trp) and Iqw (Lle-Gln-Trp) Prevent Obesity Mouse Model Induced by a High-Fat Diet via Reducing Lipid Deposition and Reprogramming Gut Microbiota
Source: MDPI journal article supplement (doi:10.3390/ijms231911227), 2022-09-23
Supplement: s1 [file s1]

## Supplementary materials

**Table S1.** Primers used in this study.

| Gene           | 5'-3' Primer sequence        |
|----------------|------------------------------|
| $\beta$ -actin | F: TGTCCACCTTCCAGCAGATGT     |
|                | R: AGCTCAGTAACAGTCCGCCTAGA   |
| DGAT1          | F: TTCCGCCTCTGGGCATT         |
|                | R: AGAATCGGCCCACAATCCA       |
| DGAT2          | F: AGTGGCAATGCTATCATCATCGT   |
|                | R: TCTTCTGGACCCATCGGCCCCAGGA |
| Cpt1a          | F: CAGTCGACTCACCTTTCCTG      |
|                | R: CATCATGGCTTGTCTCAAGTG     |
| Acadm          | F: TGCTCGCAGAAATGGCGATGA     |
|                | R: CAATGTGCTCACGAGCTATGA     |
| TNF- $\alpha$  | F: ATGAGAAGTTCCCAAATGGC      |
|                | R: CTCCACTTGGTGGTTTGCTA      |
| IL-6           | F: CCTCTCTGCAAGAGACTTCCAT    |
|                | R: AGTCTCCTCTCCGGACTTGT      |
| IL-1 $\beta$   | F: TGCCACCTTTTGACAGTGATG     |
|                | R: AAGGTCCACGGGAAAGACAC      |

The GC system detection program:

Nitrogen as carrier gas entered the detection system at a velocity of 40 mL/min. The initial temperature of the oven was 60°C and kept for 2 min, and then the temperature rose to 220°C at 20°C/min and hold for 3.5 min. The temperature of FID and inlet temperature was 260°C and 250°C respectively. The flow rates of hydrogen and air as fuel gas and oxidizer gas were 30 mL/min and 350 mL/min, respectively. The injection volume was 1  $\mu$ L.
